# Supplementary material for: Myocarditis and Pericarditis Post-mRNA COVID-19 Vaccination: Insights from a Pharmacovigilance Perspective
Source: MDPI journal article supplement (doi:10.3390/jcm12154971), 2023-07-28
Supplement: s1 [file s1]

## Supplementary Material

### Myocarditis and Pericarditis Post mRNA COVID-19 Vaccination: Insights from a Pharmacovigilance Perspective

Abdallah Alami, Paul J. Villeneuve, Patrick J. Farrell, Donald Mattison, Nawal Farhat, Nisrine Haddad, Kumanan Wilson, Christopher A. Gravel, James A. G. Crispo, Santiago Perez-Lloret, Daniel Krewski

The supplementary material includes six tables providing additional details on the analyses and findings reported in this article. Table S1 lists the MedDRA preferred terms used for adjudication of AEFIS reports with symptoms of myocarditis and pericarditis according to the CDC's case definition for probable myocarditis. Table S2 presents the number of AEFIS reports in VAERS, categorized by vaccine type and antigen. Table S3 offers information on myo/pericarditis cases sorted by vaccine type and manufacturer. Table S3 shows reported outcomes for myo/pericarditis in the VAERS database. Table S4 highlights the sex-specific age distribution of reported myo/pericarditis adverse events following vaccination in VAERS data. Lastly, Table S5 contains the MedDRA terminology SOC list, arranged according to the internationally agreed order.

**Table S1: MedDRA preferred terms used for adjudication of AEFIS reports with symptoms of myo/pericarditis**

| Cardiac symptoms                           |                                                   |                                               |
|--------------------------------------------|---------------------------------------------------|-----------------------------------------------|
| Accelerated idioventricular rhythm         | ECG signs of myocardial infarction                | Right atrial volume increased                 |
| Arrhythmia                                 | ECG signs of myocardial ischaemia                 | Right ventricular ejection fraction decreased |
| Arrhythmia supraventricular                | ECG signs of ventricular hypertrophy              | Right ventricular systolic pressure decreased |
| Atrial fibrillation                        | Echocardiogram abnormal                           | Right ventricular systolic pressure increased |
| Atrial flutter                             | Ejection fraction abnormal                        | Sinoatrial block                              |
| Atrial parasystole                         | Ejection fraction decreased                       | Sinus arrhythmia                              |
| Atrial tachycardia                         | Electrocardiogram abnormal                        | Sinus bradycardia                             |
| Atrioventricular block                     | Electrocardiogram ambulatory abnormal             | Sinus tachycardia                             |
| Atrioventricular block complete            | Electrocardiogram ST segment depression           | Stress echocardiogram abnormal                |
| Atrioventricular block first degree        | Electrocardiogram ST segment elevation            | Stroke volume decreased                       |
| Atrioventricular block second degree       | Electrocardiogram ST-T change                     | Stroke volume increased                       |
| Atrioventricular conduction time shortened | Electrocardiogram ST-T segment abnormal           | Supraventricular extrasystoles                |
| Atrioventricular dissociation              | Electrocardiogram ST-T segment depression         | Supraventricular tachyarrhythmia              |
| Atrioventricular node dispersion           | Electrocardiogram ST-T segment elevation          | Supraventricular tachycardia                  |
| Atrioventricular node dysfunction          | Electrocardiogram T wave abnormal                 | Tachyarrhythmia                               |
| Biopsy heart abnormal                      | Exercise electrocardiogram abnormal               | Tachycardia                                   |
| Biopsy pericardium abnormal                | Extrasystoles                                     | Tachycardia paroxysmal                        |
| Bradyarrhythmia                            | Intracardiac pressure increased                   | Trifascicular block                           |
| Bradycardia                                | Left atrial volume abnormal                       | Troponin I increased                          |
| Bundle branch block                        | Left atrial volume decreased                      | Troponin increased                            |
| Cardiac fibrillation                       | Left ventricular end-diastolic pressure decreased | Troponin T increased                          |

|                                                                                                               |                                                   |                             |
|---------------------------------------------------------------------------------------------------------------|---------------------------------------------------|-----------------------------|
| Cardiac flutter                                                                                               | Left ventricular end-diastolic pressure increased | Ventricular arrhythmia      |
| Cardiac function test abnormal                                                                                | Long QT syndrome                                  | Ventricular asystole        |
| Cardiac imaging procedure abnormal                                                                            | Magnetic resonance imaging abnormal               | Ventricular extrasystoles   |
| Cardiac index abnormal                                                                                        | Myocardial hypoperfusion                          | Ventricular fibrillation    |
| Cardiac index decreased                                                                                       | Myocardial oedema                                 | Ventricular flutter         |
| Cardiac index increased                                                                                       | Myocarditis                                       | Ventricular parasystole     |
| Cardiac monitoring abnormal                                                                                   | Myopericarditis                                   | Ventricular pre-excitation  |
| Cardiac output decreased                                                                                      | Palpitations                                      | Ventricular tachyarrhythmia |
| Cardiac output increased                                                                                      | Parasystole                                       | Ventricular tachycardia     |
| Cardiac ventriculogram abnormal                                                                               | Paroxysmal arrhythmia                             |                             |
| Cardiac ventriculogram left                                                                                   | Paroxysmal atrioventricular block                 |                             |
| Cardiac ventriculogram left abnormal                                                                          | Pericardial effusion                              |                             |
| Cardiac ventriculogram right abnormal                                                                         | Pericardial rub                                   |                             |
| Cardiovascular function test abnormal                                                                         | Pericarditis                                      |                             |
| Central venous pressure abnormal                                                                              | Right atrial pressure increased                   |                             |
| Conduction disorder                                                                                           | Right atrial volume abnormal                      |                             |
| Defect conduction intraventricular                                                                            | Right atrial volume decreased                     |                             |
| <b>Clinical symptoms</b>                                                                                      |                                                   |                             |
| Chest discomfort                                                                                              |                                                   |                             |
| Chest pain                                                                                                    |                                                   |                             |
| Dyspnoea                                                                                                      |                                                   |                             |
| Dyspnoea at rest                                                                                              |                                                   |                             |
| Dyspnoea exertional                                                                                           |                                                   |                             |
| Dyspnoea paroxysmal nocturnal                                                                                 |                                                   |                             |
| Infantile spitting up*                                                                                        |                                                   |                             |
| Infantile vomiting*                                                                                           |                                                   |                             |
| Irregular breathing*                                                                                          |                                                   |                             |
| Irritability*                                                                                                 |                                                   |                             |
| Lethargy*                                                                                                     |                                                   |                             |
| Neonatal tachypnoea*                                                                                          |                                                   |                             |
| Nocturnal dyspnoea                                                                                            |                                                   |                             |
| Orthopnoea                                                                                                    |                                                   |                             |
| Poor feeding infant*                                                                                          |                                                   |                             |
| Syncope                                                                                                       |                                                   |                             |
| Tachypnoea*                                                                                                   |                                                   |                             |
| * infants and children <12 years of age may instead require at least 2 of these PT terms as clinical symptoms |                                                   |                             |

Table S2. Number of AEFIs reported in VAERS by vaccine type and antigen.

| Vaccine code | Vaccine description                                                                                                                             | N         |
|--------------|-------------------------------------------------------------------------------------------------------------------------------------------------|-----------|
| 6VAX-F       | Diphtheria and tetanus toxoids and acellular pertussis adsorbed + inactivated poliovirus + hepatitis B + haemophilus B conjugate vaccine        | 9         |
| ADEN_4_7     | Adenovirus type 4 and 7 vaccine, live oral                                                                                                      | 64        |
| ANTH         | Anthrax vaccine                                                                                                                                 | 243       |
| BCG          | Bacillus Calmette-Guerin vaccine                                                                                                                | 20        |
| CHOL         | Cholera vaccine                                                                                                                                 | 42        |
| COVID19      | Coronavirus 2019 vaccine                                                                                                                        | 1,216,221 |
| DF           | Dengue fever vaccine                                                                                                                            | 64        |
| DT           | Diphtheria and tetanus toxoids, pediatric                                                                                                       | 41        |
| DTAP         | Diphtheria and tetanus toxoids and acellular pertussis vaccine                                                                                  | 1,443     |
| DTAPH        | Diphtheria and tetanus toxoids and acellular pertussis vaccine +                                                                                | 3         |
| DTAPHEPBIP   | Diphtheria and tetanus toxoids and acellular pertussis vaccine + hepatitis B + inactivated poliovirus vaccine                                   | 841       |
| DTAPIPV      | Diphtheria and tetanus toxoids and acellular pertussis vaccine + inactivated                                                                    | 1,411     |
| DTAPIPVHIB   | Diphtheria and tetanus toxoids and acellular pertussis vaccine + inactivated poliovirus vaccine + haemophilus B conjugate vaccine               | 1,020     |
| DTOX         | Diphtheria toxoid                                                                                                                               | 1         |
| DTP          | Diphtheria and tetanus toxoids and pertussis vaccine                                                                                            | 24        |
| DTPHEP       | Diphtheria, tetanus, pertussis + hepatitis B                                                                                                    | 1         |
| DTPPVHBHPB   | Diphtheria and tetanus toxoids and acellular pertussis vaccine + inactivated poliovirus vaccine + haemophilus B conjugate vaccine + hepatitis B | 137       |
| EBZR         | Ebola Zaire vaccine                                                                                                                             | 65        |
| FLU(H1N1)    | Influenza (H1N1) monovalent                                                                                                                     | 2         |
| FLU3         | Influenza virus vaccine, trivalent                                                                                                              | 263       |
| FLU4         | Influenza virus vaccine, quadrivalent                                                                                                           | 8,642     |
| FLUA3        | Influenza virus vaccine, trivalent, adjuvant                                                                                                    | 161       |
| FLUA4        | Influenza virus vaccine, quadrivalent, adjuvant                                                                                                 | 1,146     |
| FLUC3        | Influenza virus vaccine, trivalent, cell-culture-derived                                                                                        | 108       |
| FLUC4        | Influenza virus vaccine, quadrivalent, cell-culture-derived                                                                                     | 1,088     |
| FLUN3        | Influenza virus vaccine (nasal spray)                                                                                                           | 7         |
| FLUN4        | Influenza virus vaccine quadrivalent (nasal spray)                                                                                              | 105       |
| FLUR3        | Influenza virus vaccine, trivalent, recombinant                                                                                                 | 6         |
| FLUR4        | Influenza virus vaccine, quadrivalent, recombinant                                                                                              | 761       |
| FLUX         | Influenza virus vaccine, unknown manufacturer                                                                                                   | 3,580     |
| FLUX(H1N1)   | Influenza (H1N1) monovalent, unknown manufacturer                                                                                               | 16        |
| H5N1         | Pandemic flu vaccine                                                                                                                            | 1         |
| HEP          | Hepatitis B virus vaccine                                                                                                                       | 2,590     |
| HEPA         | Hepatitis A                                                                                                                                     | 2,547     |
| HEPAB        | Hepatitis A + hepatitis B                                                                                                                       | 416       |

|                 |                                                                                     |        |
|-----------------|-------------------------------------------------------------------------------------|--------|
| <b>HEPATYP</b>  | Inactivated hepatitis a + typhoid polysaccharide vaccine adsorbed                   | 2      |
| <b>HIBV</b>     | Haemophilus B conjugate vaccine                                                     | 1,633  |
| <b>HPV4</b>     | Human papillomavirus quadrivalent                                                   | 653    |
| <b>HPV9</b>     | Human papillomavirus 9-valent                                                       | 3,278  |
| <b>HPVX</b>     | Human papillomavirus (no brand name)                                                | 36     |
| <b>IPV</b>      | Poliovirus vaccine inactivated                                                      | 737    |
| <b>JEV1</b>     | Japanese encephalitis virus vaccine, inactivated                                    | 41     |
| <b>JEVX</b>     | Japanese encephalitis virus vaccine (no brand name)                                 | 12     |
| <b>MEN</b>      | Meningococcal polysaccharide vaccine                                                | 93     |
| <b>MENB</b>     | Meningococcal group b vaccine, rDNA absorbed                                        | 1,487  |
| <b>MMR</b>      | Measles, mumps and rubella virus vaccine, live                                      | 2,539  |
| <b>MMRV</b>     | Measles, mumps, rubella and varicella vaccine live                                  | 2,261  |
| <b>MNQ</b>      | Meningococcal conjugate vaccine                                                     | 2,449  |
| <b>MNQHIB</b>   | Meningococcal groups c and y + haemophilus B tetanus toxoid conjugate               | 1      |
| <b>MU</b>       | Mumps virus vaccine, live                                                           | 1      |
| <b>OPV</b>      | Poliovirus vaccine trivalent, live, oral                                            | 3      |
| <b>PER</b>      | Pertussis vaccine                                                                   | 2      |
| <b>PNC</b>      | Pneumococcal 7-valent conjugate vaccine                                             | 54     |
| <b>PNC10</b>    | Pneumococcal 10-valent conjugate vaccine                                            | 2      |
| <b>PNC13</b>    | Pneumococcal 13-valent conjugate vaccine                                            | 2,174  |
| <b>PNC15</b>    | Pneumococcal 15-valent Conjugate Vaccine                                            | 17     |
| <b>PNC20</b>    | Pneumococcal 20-valent conjugate vaccine                                            | 379    |
| <b>PPV</b>      | Pneumococcal vaccine, polyvalent                                                    | 3,070  |
| <b>RAB</b>      | Rabies virus vaccine                                                                | 366    |
| <b>RV1</b>      | Rotavirus vaccine, live, oral                                                       | 365    |
| <b>RV5</b>      | Rotavirus vaccine, live, oral, pentavalent                                          | 1,329  |
| <b>RVX</b>      | Rotavirus (no brand name)                                                           | 37     |
| <b>SMALL</b>    | Smallpox vaccine                                                                    | 63     |
| <b>SMALLMNK</b> | Smallpox + monkeypox vaccine                                                        | 41     |
| <b>TD</b>       | Tetanus and diphtheria toxoids, adult                                               | 343    |
| <b>TDAP</b>     | Tetanus toxoid, reduced diphtheria toxoid and acellular pertussis vaccine, adsorbed | 3,151  |
| <b>TDAPIPV</b>  | Tetanus, diphtheria and acellular pertussis, and inactivated polio virus            | 2      |
| <b>TTOX</b>     | Tetanus toxoid                                                                      | 51     |
| <b>TYP</b>      | Typhoid vaccine                                                                     | 300    |
| <b>UNK</b>      | Unknown                                                                             | 16,958 |
| <b>VARCEL</b>   | Varivax-varicella virus live                                                        | 3,028  |
| <b>VARZOS</b>   | Varicella-zoster vaccine                                                            | 24,164 |
| <b>YF</b>       | Yellow fever vaccine                                                                | 193    |

**Table S3. Myo/pericarditis by vaccine type and manufacturer**

| Vaccine manufacturer              | Vaccine type                       | N     |
|-----------------------------------|------------------------------------|-------|
| PFIZER\BIONTECH                   | COVID19                            | 3,124 |
| MODERNA                           | COVID19                            | 1,738 |
| JANSSEN                           | COVID19                            | 204   |
| UNKNOWN MANUFACTURER              | COVID19                            | 24    |
| GLAXOSMITHKLINE BIOLOGICALS       | Varicella-Zoster                   | 8     |
| SANOFI PASTEUR                    | Smallpox                           | 7     |
| SEQIRUS, INC.                     | Influenza                          | 7     |
| UNKNOWN MANUFACTURER              | Influenza                          | 7     |
| NOVARTIS VACCINES AND DIAGNOSTICS | Meningococcal                      | 6     |
| MERCK & CO. INC.                  | Pneumococcal                       | 5     |
| GLAXOSMITHKLINE BIOLOGICALS       | Influenza                          | 3     |
| MERCK & CO. INC.                  | Human papillomavirus               | 3     |
| MERCK & CO. INC.                  | Measles, Mumps, Rubella, Varicella | 2     |
| MERCK & CO. INC.                  | Varicella-Zoster                   | 2     |
| SANOFI PASTEUR                    | Influenza                          | 2     |
| EMERGENT BIOSOLUTIONS             | Anthrax                            | 1     |
| GLAXOSMITHKLINE BIOLOGICALS       | Hepatitis                          | 1     |
| NOVARTIS VACCINES AND DIAGNOSTICS | Rabies                             | 1     |
| PFIZER\WYETH                      | Meningococcal                      | 1     |
| PROTEIN SCIENCES CORPORATION      | Influenza                          | 1     |
| SANOFI PASTEUR                    | Yellow Fever                       | 1     |
| UNKNOWN MANUFACTURER              | Anthrax                            | 1     |
| UNKNOWN MANUFACTURER              | Japanese Encephalitis              | 1     |
| UNKNOWN MANUFACTURER              | Rabies                             | 1     |
| UNKNOWN MANUFACTURER              | Smallpox                           | 1     |
| UNKNOWN MANUFACTURER              | Typhoid                            | 1     |
| UNKNOWN MANUFACTURER              | Varicella-Zoster                   | 1     |

**Table S4. Reported outcomes for myo/pericarditis in VAERS**

| Outcome                                        | N     |
|------------------------------------------------|-------|
| Hospitalized                                   | 2,966 |
| Emergency room/department or urgent care visit | 2,523 |
| Doctor or other healthcare professional office | 1,991 |
| Life threatening                               | 726   |
| Disability                                     | 274   |
| Death                                          | 84    |
| Congenital anomaly or birth defect             | 10    |

**Table S5. Sex-Specific Age Distribution of Reported Myo/Pericarditis Adverse Events Following Vaccination in VAERS Data**

| <b>Sex</b> | <b>Age group</b> | <b>N</b> | <b>Percentage</b> |
|------------|------------------|----------|-------------------|
| <b>F</b>   | 6 months-4 years | 2        | 0                 |
| <b>M</b>   | 6 months-4 years | 2        | 0                 |
| <b>F</b>   | 5-11 years       | 5        | 0.1               |
| <b>M</b>   | 5-11 years       | 22       | 0.5               |
| <b>F</b>   | 12-17 years      | 90       | 2                 |
| <b>M</b>   | 12-17 years      | 649      | 14.7              |
| <b>F</b>   | 18-24 years      | 154      | 3.5               |
| <b>M</b>   | 18-24 years      | 754      | 17.1              |
| <b>F</b>   | 25-30 years      | 161      | 3.7               |
| <b>M</b>   | 25-30 years      | 377      | 8.6               |
| <b>F</b>   | 31-40 years      | 246      | 5.6               |
| <b>M</b>   | 31-40 years      | 431      | 9.8               |
| <b>F</b>   | 41-50 years      | 246      | 5.6               |
| <b>M</b>   | 41-50 years      | 247      | 5.6               |
| <b>F</b>   | 51-60 years      | 226      | 5.1               |
| <b>M</b>   | 51-60 years      | 207      | 4.7               |
| <b>F</b>   | 61-70 years      | 184      | 4.2               |
| <b>M</b>   | 61-70 years      | 170      | 3.9               |
| <b>F</b>   | 71-80 years      | 84       | 1.9               |
| <b>M</b>   | 71-80 years      | 98       | 2.2               |
| <b>F</b>   | 81-90 years      | 22       | 0.5               |
| <b>M</b>   | 81-90 years      | 19       | 0.4               |
| <b>F</b>   | 91+ years        | 3        | 0.1               |
| <b>M</b>   | 91+ years        | 4        | 0.1               |

Table S6. MedDRA terminology SOC list based on internationally agreed order.

| SOC                                                                 | Rank |
|---------------------------------------------------------------------|------|
| Infections and infestations                                         | 1    |
| Neoplasms benign, malignant and unspecified (incl cysts and polyps) | 2    |
| Blood and lymphatic system disorders                                | 3    |
| Immune system disorders                                             | 4    |
| Endocrine disorders                                                 | 5    |
| Metabolism and nutrition disorders                                  | 6    |
| Psychiatric disorders                                               | 7    |
| Nervous system disorders                                            | 8    |
| Eye disorders                                                       | 9    |
| Ear and labyrinth disorders                                         | 10   |
| Cardiac disorders                                                   | 11   |
| Vascular disorders                                                  | 12   |
| Respiratory, thoracic and mediastinal disorders                     | 13   |
| Gastrointestinal disorders                                          | 14   |
| Hepatobiliary disorders                                             | 15   |
| Skin and subcutaneous tissue disorders                              | 16   |
| Musculoskeletal and connective tissue disorders                     | 17   |
| Renal and urinary disorders                                         | 18   |
| Pregnancy, puerperium and perinatal conditions                      | 19   |
| Reproductive system and breast disorders                            | 20   |
| Congenital, familial and genetic disorders                          | 21   |
| General disorders and administration site conditions                | 22   |
| Investigations                                                      | 23   |
| Injury, poisoning and procedural complications                      | 24   |
| Surgical and medical procedures                                     | 25   |
| Social circumstances                                                | 26   |
| Product issues                                                      | 27   |
